## Correction

# Correction: Miltefosine and Antimonial Drug Susceptibility of *Leishmania Viannia* Species and Populations in Regions of High Transmission in Colombia

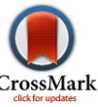

## The PLOS Neglected Tropical Diseases Staff

The latter surname of the 6<sup>th</sup> author was omitted. The author's full name is Isabel Rodríguez-Barraquer.

## Reference

1. Fernández OL, Diaz-Toro Y, Ovalle C, Valderrama L, Muvdi S, et al. (2014) Miltefosine and Antimonial Drug Susceptibility of *Leishmania Viannia* Species and Populations in Regions of High Transmission in Colombia. PLoS Negl Trop Dis 8(5): e2871. doi:10.1371/journal.pntd.0002871

**Citation:** The PLOS Neglected Tropical Diseases Staff (2014) Correction: Miltefosine and Antimonial Drug Susceptibility of *Leishmania Viannia* Species and Populations in Regions of High Transmission in Colombia. PLoS Negl Trop Dis 8(6): e3026. doi:10.1371/journal.pntd.0003026

**Published:** June 20, 2014

**Copyright:** © 2014 The PLOS Neglected Tropical Diseases Staff. This is an open-access article distributed under the terms of the Creative Commons Attribution License, which permits unrestricted use, distribution, and reproduction in any medium, provided the original author and source are credited.
